# Supplementary material for: Clinical Characteristics and Outcomes in 314 Japanese Patients with Bacterial Endophthalmitis: A Multicenter Cohort Study from J-CREST
Source: MDPI journal article supplement (doi:10.3390/pathogens10040390), 2021-03-24
Supplement: s1 [file s1]

| Year | Month | Day | Time  | Location | Activity  | Duration    | Frequency | Intensity | Notes                                       |
|------|-------|-----|-------|----------|-----------|-------------|-----------|-----------|---------------------------------------------|
| 2023 | 1     | 1   | 10:00 | Room 101 | Classroom | 10:00-11:00 | 1         | 1.0       | First class of the semester                 |
| 2023 | 1     | 2   | 10:00 | Room 101 | Classroom | 10:00-11:00 | 1         | 1.0       | Second class of the semester                |
| 2023 | 1     | 3   | 10:00 | Room 101 | Classroom | 10:00-11:00 | 1         | 1.0       | Third class of the semester                 |
| 2023 | 1     | 4   | 10:00 | Room 101 | Classroom | 10:00-11:00 | 1         | 1.0       | Fourth class of the semester                |
| 2023 | 1     | 5   | 10:00 | Room 101 | Classroom | 10:00-11:00 | 1         | 1.0       | Fifth class of the semester                 |
| 2023 | 1     | 6   | 10:00 | Room 101 | Classroom | 10:00-11:00 | 1         | 1.0       | Sixth class of the semester                 |
| 2023 | 1     | 7   | 10:00 | Room 101 | Classroom | 10:00-11:00 | 1         | 1.0       | Seventh class of the semester               |
| 2023 | 1     | 8   | 10:00 | Room 101 | Classroom | 10:00-11:00 | 1         | 1.0       | Eighth class of the semester                |
| 2023 | 1     | 9   | 10:00 | Room 101 | Classroom | 10:00-11:00 | 1         | 1.0       | Ninth class of the semester                 |
| 2023 | 1     | 10  | 10:00 | Room 101 | Classroom | 10:00-11:00 | 1         | 1.0       | Tenth class of the semester                 |
| 2023 | 1     | 11  | 10:00 | Room 101 | Classroom | 10:00-11:00 | 1         | 1.0       | Eleventh class of the semester              |
| 2023 | 1     | 12  | 10:00 | Room 101 | Classroom | 10:00-11:00 | 1         | 1.0       | Twelfth class of the semester               |
| 2023 | 1     | 13  | 10:00 | Room 101 | Classroom | 10:00-11:00 | 1         | 1.0       | Thirteenth class of the semester            |
| 2023 | 1     | 14  | 10:00 | Room 101 | Classroom | 10:00-11:00 | 1         | 1.0       | Fourteenth class of the semester            |
| 2023 | 1     | 15  | 10:00 | Room 101 | Classroom | 10:00-11:00 | 1         | 1.0       | Fifteenth class of the semester             |
| 2023 | 1     | 16  | 10:00 | Room 101 | Classroom | 10:00-11:00 | 1         | 1.0       | Sixteenth class of the semester             |
| 2023 | 1     | 17  | 10:00 | Room 101 | Classroom | 10:00-11:00 | 1         | 1.0       | Seventeenth class of the semester           |
| 2023 | 1     | 18  | 10:00 | Room 101 | Classroom | 10:00-11:00 | 1         | 1.0       | Eighteenth class of the semester            |
| 2023 | 1     | 19  | 10:00 | Room 101 | Classroom | 10:00-11:00 | 1         | 1.0       | Nineteenth class of the semester            |
| 2023 | 1     | 20  | 10:00 | Room 101 | Classroom | 10:00-11:00 | 1         | 1.0       | Twentieth class of the semester             |
| 2023 | 1     | 21  | 10:00 | Room 101 | Classroom | 10:00-11:00 | 1         | 1.0       | Twenty-first class of the semester          |
| 2023 | 1     | 22  | 10:00 | Room 101 | Classroom | 10:00-11:00 | 1         | 1.0       | Twenty-second class of the semester         |
| 2023 | 1     | 23  | 10:00 | Room 101 | Classroom | 10:00-11:00 | 1         | 1.0       | Twenty-third class of the semester          |
| 2023 | 1     | 24  | 10:00 | Room 101 | Classroom | 10:00-11:00 | 1         | 1.0       | Twenty-fourth class of the semester         |
| 2023 | 1     | 25  | 10:00 | Room 101 | Classroom | 10:00-11:00 | 1         | 1.0       | Twenty-fifth class of the semester          |
| 2023 | 1     | 26  | 10:00 | Room 101 | Classroom | 10:00-11:00 | 1         | 1.0       | Twenty-sixth class of the semester          |
| 2023 | 1     | 27  | 10:00 | Room 101 | Classroom | 10:00-11:00 | 1         | 1.0       | Twenty-seventh class of the semester        |
| 2023 | 1     | 28  | 10:00 | Room 101 | Classroom | 10:00-11:00 | 1         | 1.0       | Twenty-eighth class of the semester         |
| 2023 | 1     | 29  | 10:00 | Room 101 | Classroom | 10:00-11:00 | 1         | 1.0       | Twenty-ninth class of the semester          |
| 2023 | 1     | 30  | 10:00 | Room 101 | Classroom | 10:00-11:00 | 1         | 1.0       | Thirtieth class of the semester             |
| 2023 | 1     | 31  | 10:00 | Room 101 | Classroom | 10:00-11:00 | 1         | 1.0       | Final class of the semester                 |
| 2023 | 2     | 1   | 10:00 | Room 101 | Classroom | 10:00-11:00 | 1         | 1.0       | First class of the second semester          |
| 2023 | 2     | 2   | 10:00 | Room 101 | Classroom | 10:00-11:00 | 1         | 1.0       | Second class of the second semester         |
| 2023 | 2     | 3   | 10:00 | Room 101 | Classroom | 10:00-11:00 | 1         | 1.0       | Third class of the second semester          |
| 2023 | 2     | 4   | 10:00 | Room 101 | Classroom | 10:00-11:00 | 1         | 1.0       | Fourth class of the second semester         |
| 2023 | 2     | 5   | 10:00 | Room 101 | Classroom | 10:00-11:00 | 1         | 1.0       | Fifth class of the second semester          |
| 2023 | 2     | 6   | 10:00 | Room 101 | Classroom | 10:00-11:00 | 1         | 1.0       | Sixth class of the second semester          |
| 2023 | 2     | 7   | 10:00 | Room 101 | Classroom | 10:00-11:00 | 1         | 1.0       | Seventh class of the second semester        |
| 2023 | 2     | 8   | 10:00 | Room 101 | Classroom | 10:00-11:00 | 1         | 1.0       | Eighth class of the second semester         |
| 2023 | 2     | 9   | 10:00 | Room 101 | Classroom | 10:00-11:00 | 1         | 1.0       | Ninth class of the second semester          |
| 2023 | 2     | 10  | 10:00 | Room 101 | Classroom | 10:00-11:00 | 1         | 1.0       | Tenth class of the second semester          |
| 2023 | 2     | 11  | 10:00 | Room 101 | Classroom | 10:00-11:00 | 1         | 1.0       | Eleventh class of the second semester       |
| 2023 | 2     | 12  | 10:00 | Room 101 | Classroom | 10:00-11:00 | 1         | 1.0       | Twelfth class of the second semester        |
| 2023 | 2     | 13  | 10:00 | Room 101 | Classroom | 10:00-11:00 | 1         | 1.0       | Thirteenth class of the second semester     |
| 2023 | 2     | 14  | 10:00 | Room 101 | Classroom | 10:00-11:00 | 1         | 1.0       | Fourteenth class of the second semester     |
| 2023 | 2     | 15  | 10:00 | Room 101 | Classroom | 10:00-11:00 | 1         | 1.0       | Fifteenth class of the second semester      |
| 2023 | 2     | 16  | 10:00 | Room 101 | Classroom | 10:00-11:00 | 1         | 1.0       | Sixteenth class of the second semester      |
| 2023 | 2     | 17  | 10:00 | Room 101 | Classroom | 10:00-11:00 | 1         | 1.0       | Seventeenth class of the second semester    |
| 2023 | 2     | 18  | 10:00 | Room 101 | Classroom | 10:00-11:00 | 1         | 1.0       | Eighteenth class of the second semester     |
| 2023 | 2     | 19  | 10:00 | Room 101 | Classroom | 10:00-11:00 | 1         | 1.0       | Nineteenth class of the second semester     |
| 2023 | 2     | 20  | 10:00 | Room 101 | Classroom | 10:00-11:00 | 1         | 1.0       | Twentieth class of the second semester      |
| 2023 | 2     | 21  | 10:00 | Room 101 | Classroom | 10:00-11:00 | 1         | 1.0       | Twenty-first class of the second semester   |
| 2023 | 2     | 22  | 10:00 | Room 101 | Classroom | 10:00-11:00 | 1         | 1.0       | Twenty-second class of the second semester  |
| 2023 | 2     | 23  | 10:00 | Room 101 | Classroom | 10:00-11:00 | 1         | 1.0       | Twenty-third class of the second semester   |
| 2023 | 2     | 24  | 10:00 | Room 101 | Classroom | 10:00-11:00 | 1         | 1.0       | Twenty-fourth class of the second semester  |
| 2023 | 2     | 25  | 10:00 | Room 101 | Classroom | 10:00-11:00 | 1         | 1.0       | Twenty-fifth class of the second semester   |
| 2023 | 2     | 26  | 10:00 | Room 101 | Classroom | 10:00-11:00 | 1         | 1.0       | Twenty-sixth class of the second semester   |
| 2023 | 2     | 27  | 10:00 | Room 101 | Classroom | 10:00-11:00 | 1         | 1.0       | Twenty-seventh class of the second semester |
| 2023 | 2     | 28  | 10:00 | Room 101 | Classroom | 10:00-11:00 | 1         | 1.0       | Twenty-eighth class of the second semester  |
| 2023 | 2     | 29  | 10:00 | Room 101 | Classroom | 10:00-11:00 | 1         | 1.0       | Twenty-ninth class of the second semester   |
| 2023 | 2     | 30  | 10:00 | Room 101 | Classroom | 10:00-11:00 | 1         | 1.0       | Thirtieth class of the second semester      |
| 2023 | 2     | 31  | 10:00 | Room 101 | Classroom | 10:00-11:00 | 1         | 1.0       | Final class of the second semester          |
